# Supplementary figures and images for: Neural mechanisms of response inhibition and impulsivity in 22q11.2 deletion carriers and idiopathic attention deficit hyperactivity disorder
Source: PubMed Central journal article supplement — Neuroimage Clin. 2015 Aug 20;9:310–21. doi: 10.1016/j.nicl.2015.08.006 (PMC4588418; doi:10.1016/j.nicl.2015.08.006), 2015-08-20

a)

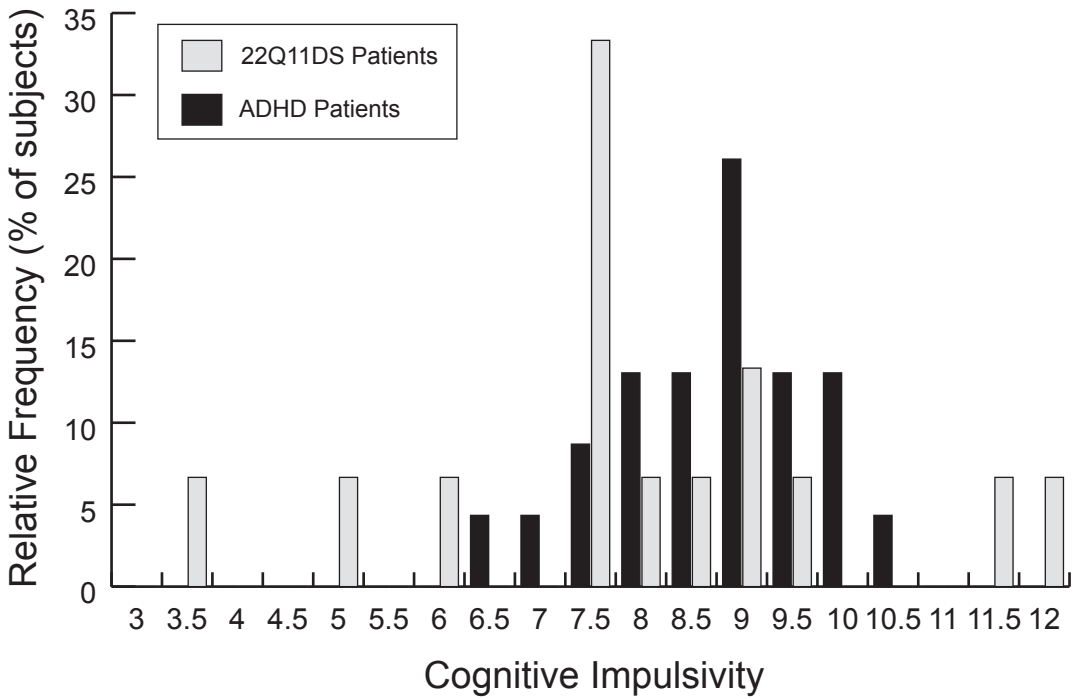

b)

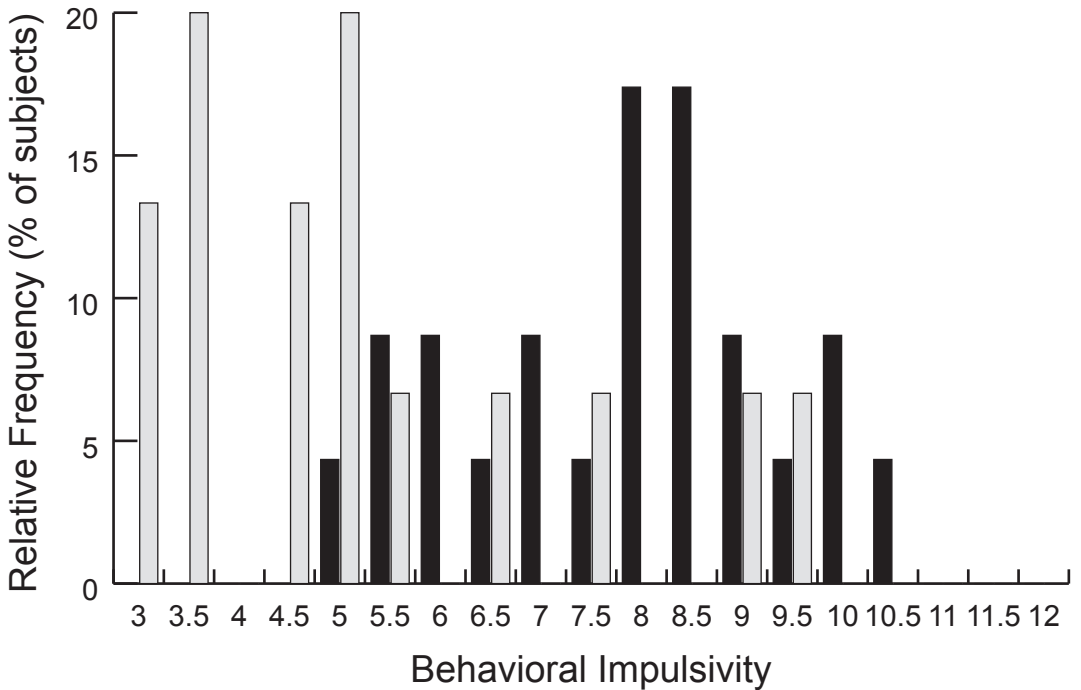

Supplement: mmc1.pdf [file mmc1.pdf]

a)

Go-Null

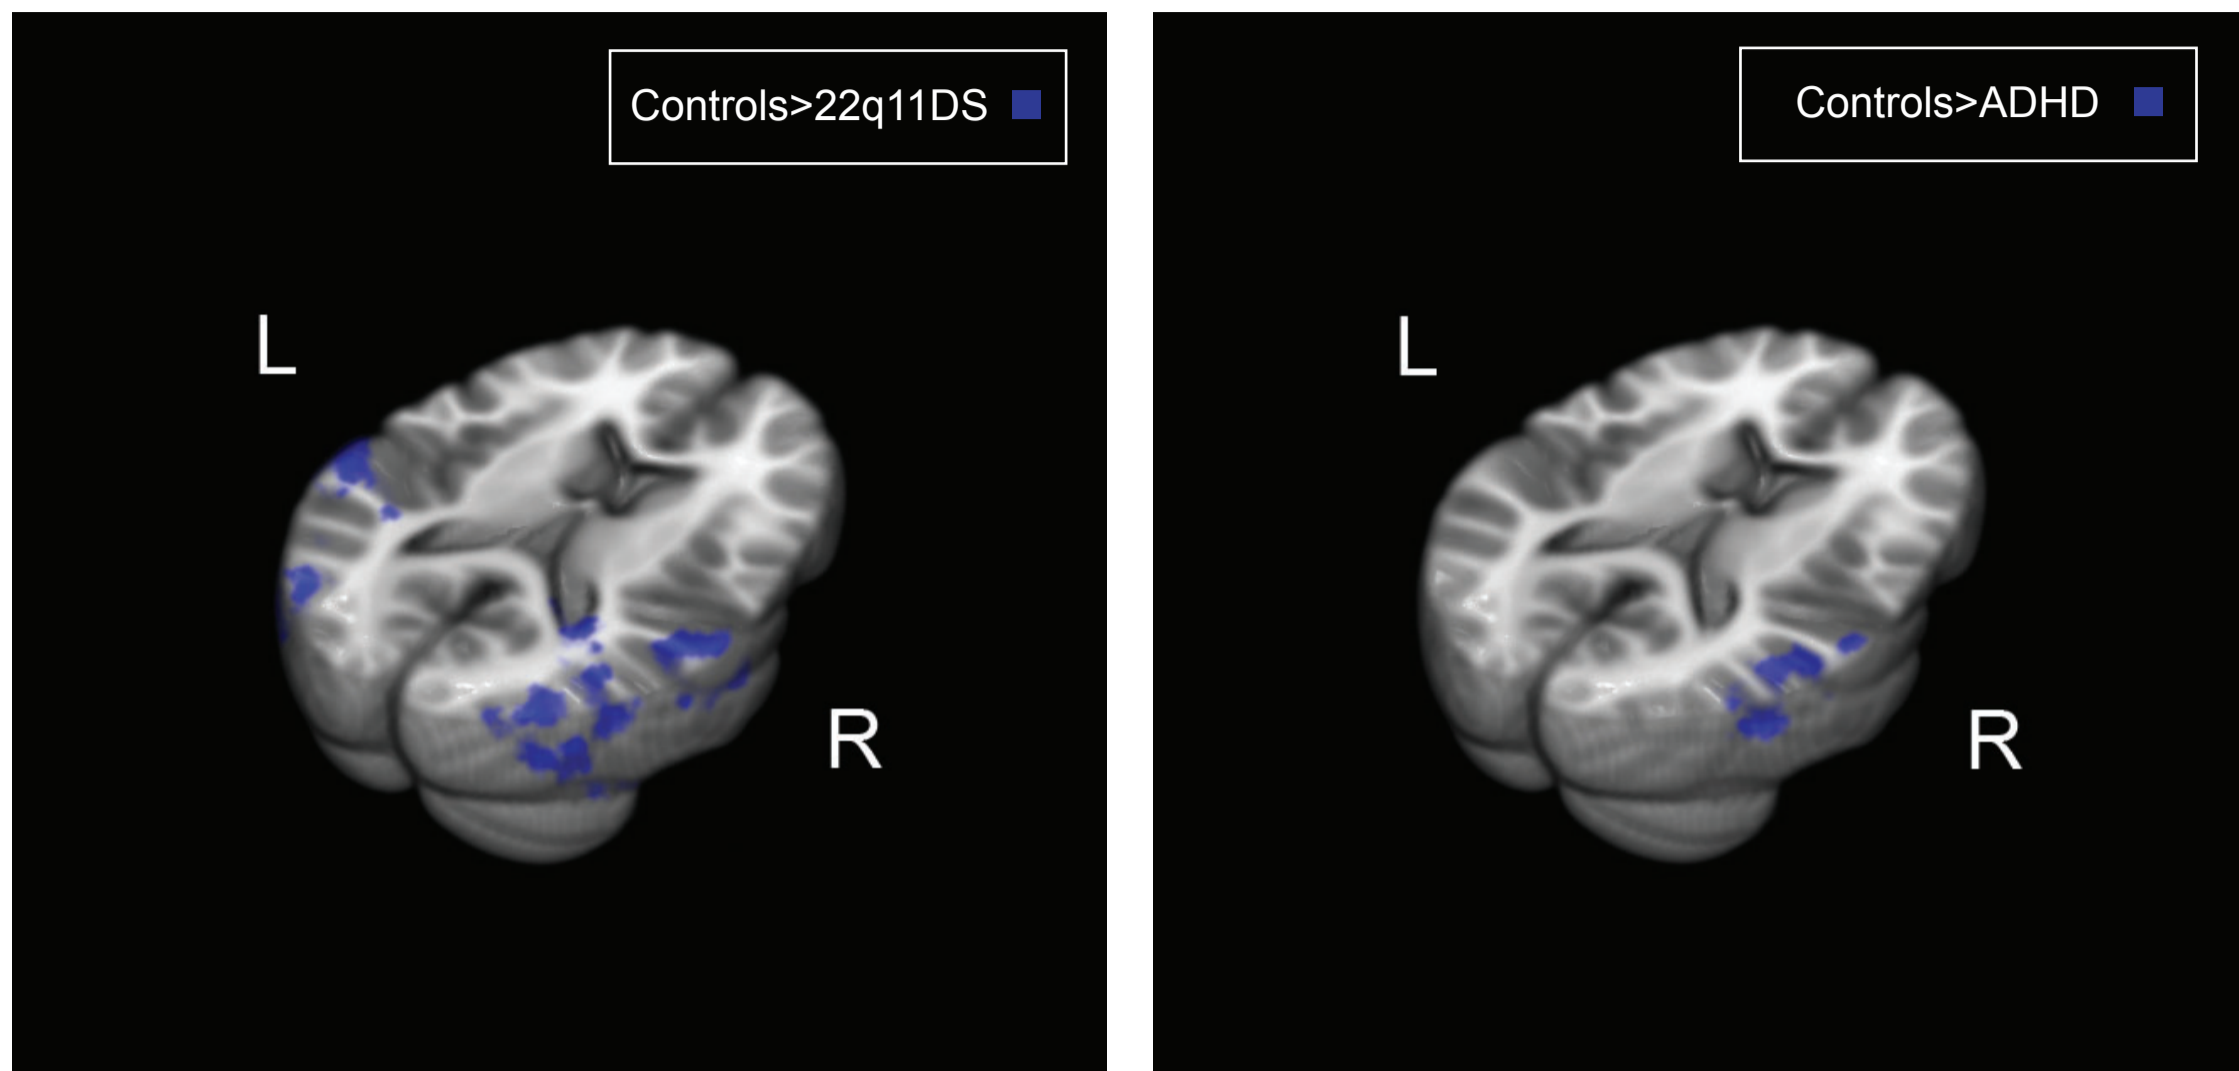

b)

Stop Unsuccessful-Stop Successful

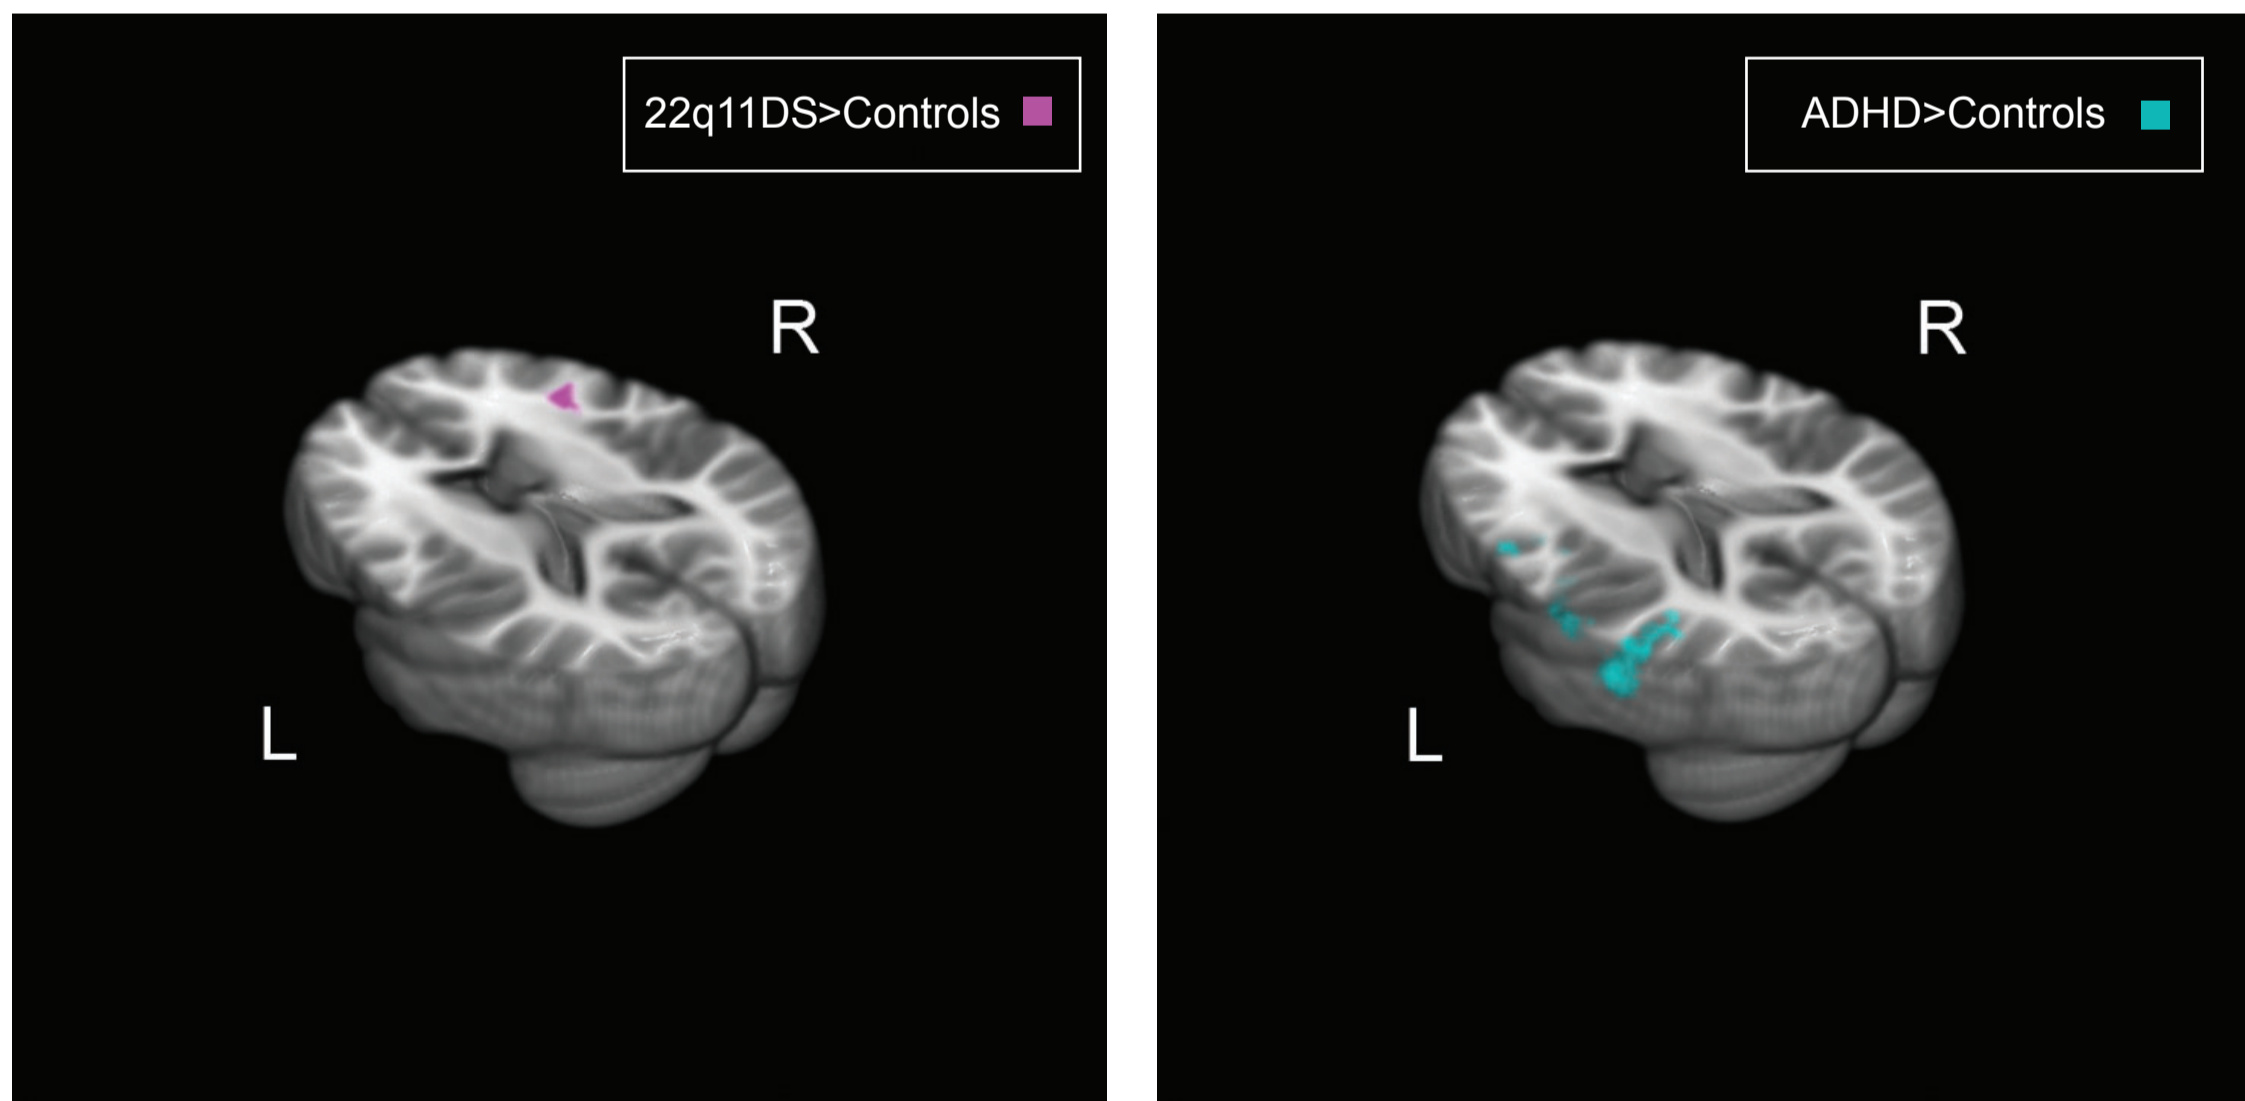

Supplement: mmc2.pdf [file mmc2.pdf]
